# Supplementary material for: Mapping the susceptibility of rain-triggered lahars at Vulcano island (Italy) combining field characterization, geotechnical analysis, and numerical modelling
Source: Copernicus journal article supplement (doi:10.5194/nhess-19-2421-2019), 2019-11-05
Supplement: Supplementary file 1 [file nhess-19-2421-2019-supplement.pdf]

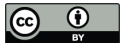

*Supplement of*

## **Mapping the susceptibility of rain-triggered lahars at Vulcano island (Italy) combining field characterization, geotechnical analysis, and numerical modelling**

**Valérie Baumann et al.**

*Correspondence to:* Costanza Bonadonna ([costanza.bonadonna@unige.ch](mailto:costanza.bonadonna@unige.ch))

The copyright of individual parts of the supplement might differ from the CC BY 4.0 License.

## Supplementary material

### Section 1: example of a recent lahar (September 2017 lahar)

A small lahar event occurred in September 2017, one month before our 2017 field work. The lahar source area was located on the NW cone flank in a funnel shaped area located above a small gully at an elevation of 159 m above sea level. The lahar flowed into a gully with an average width of 2 meter and a depth varying between 0.4 and 0.8 m (Fig. S1), formed levees on both sides and stopped on the La Fossa crater trail with a final runout of 120 m. The area of the front lobe deposit was measured with a handheld GPS (135.5 m<sup>2</sup>) and approximate thickness estimated (0.3 m) in the field, which resulted in a volume of ~40 m<sup>3</sup>. A second lahar flow pulse deposited a small deposit confined within the channel (Fig. S2). Two samples (V11 and V12) were taken from this recent lahar deposit in order to compare with the older lahar deposits.

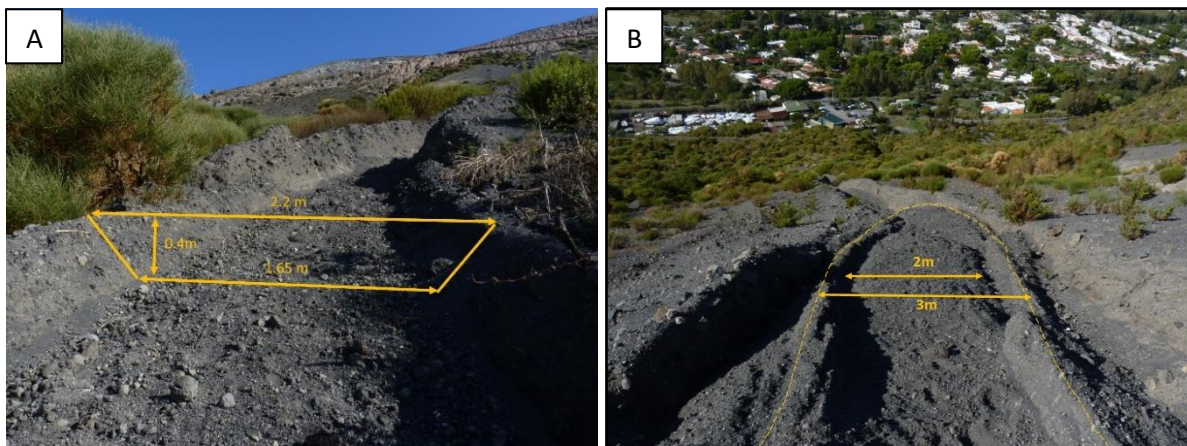

**Figure S1:** A) September 2017 lahar gully; B) September 2017 lahar deposit confined within the channel; the yellow lines mark the levee and the contour of the deposit.

## Section 2: tephra-fallout and lahar properties

In this section the grainsize distribution of both tephra-fallout and lahar samples are shown (Fig. S3). Tables S1 and S2 describe the associated suction, thickness, slope angle and grainsize characteristics.

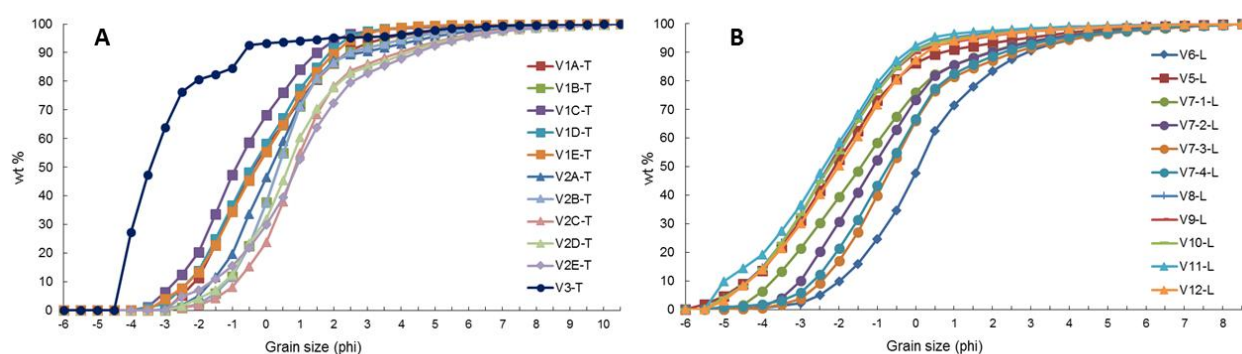

**Figure S3:** Grainsize distribution for A) primary and B) remobilised deposits (lahars). See Table S2 for a reference of sample numbers.

**Table S1:** Suction measured in the field on the 1888-90 tephra-fallout deposit and  $Md\phi$  for Su5 and Su7 (Fig. 1, main text). NA = Not available

| Location | Suction (kPa) | $Md\phi$ |
|----------|---------------|----------|
| Su1      | 25            | NA       |
| Su2      | 24            | NA       |
| Su3      | 27            | NA       |
| Su4      | 14            | NA       |
| Su5/V01  | 15            | -0.27    |
| Su6      | 15            | NA       |
| Su7/V08  | 20            | 0.90     |

**Table S2:** Summary of the physical characteristics of the tephra-fallout and lahar samples analysed. 30\*: slope is measured on GIS (Geographic Information System). *Thick.* refers to the total deposit thickness. *Unit* refers to the 1888-1890 eruption (1888-90), the Palizzi D eruption (Pal D) and lahars. For section V1 and V2, the horizon shows the sampled section interval. *F1* and *F2* refers to the weight sample fraction < 1mm and < 63  $\mu$ m, respectively.

| Site                     | Section | Name                           | Thick.<br>(cm) | Horizon | slope (°) | Mdφ   | σφ   | F1    | F2    |
|--------------------------|---------|--------------------------------|----------------|---------|-----------|-------|------|-------|-------|
| unit                     |         | 1888-90 tephra-fallout deposit |                |         |           |       |      |       |       |
| S La fossa cone          | V1      | V1A                            | 100            | 0-6     | 30        | -0.37 | 1.80 | 35.13 | 3.23  |
|                          |         | V1B                            | 100            | 6-12    | 30        | 0.08  | 1.46 | 39.99 | 2.60  |
|                          |         | V1C                            | 100            | 12-18   | 30        | -0.88 | 1.63 | 24.03 | 1.22  |
|                          |         | V1D                            | 100            | 18-24   | 30        | -0.41 | 1.68 | 32.81 | 0.84  |
|                          |         | V1E                            | 100            | 24-30   | 30        | -0.27 | 1.71 | 35.26 | 0.83  |
| NW La fossa cone<br>base | V2      | V2A                            | 50             | 0-6     | 10        | 0.14  | 1.49 | 40.81 | 5.63  |
|                          |         | V2B                            | 50             | 6-12    | 10        | 0.09  | 1.78 | 44.97 | 4.13  |
|                          |         | V2C                            | 50             | 12-18   | 10        | 0.85  | 1.51 | 62.09 | 7.86  |
|                          |         | V2D                            | 50             | 18-24   | 10        | 0.66  | 1.80 | 54.66 | 8.68  |
|                          |         | V2E                            | 50             | 24-30   | 10        | 0.90  | 2.10 | 60.41 | 9.71  |
| unit                     |         | Pal D tephra-fallout deposit   |                |         |           |       |      |       |       |
| Pallizi valley           | V3      | V3                             | 25             | -       | 10        | -3.42 | 1.55 | 6.31  | 2.83  |
| unit                     |         | Lahar deposit                  |                |         |           |       |      |       |       |
| Pallizi valley           | V6      | V6                             | 15             | -       | 5         | 2.07  | 1.78 | 84.12 | 12.38 |
| S La Fossa cone          | V5      | V5                             | 15             | -       | 30        | -0.12 | 1.83 | 37.46 | 5.73  |
| Porto di Ponente         | V7      | V7A                            | 26             | -       | 0-3       | 0.58  | 2.04 | 51.65 | 7.71  |
|                          |         | V7B                            | 11             | -       | 0-3       | 0.90  | 1.75 | 58.91 | 7.87  |
|                          |         | V7C                            | 10             | -       | 0-3       | 1.38  | 1.73 | 72.86 | 10.31 |
|                          |         | V7D                            | 6              | -       | 0-3       | 1.29  | 1.76 | 68.65 | 8.92  |
| NW La fossa cone         | V8      | V8                             | 30             | -       | 30*       | -0.29 | 1.67 | 33.27 | 2.51  |
|                          | V9      | V9                             | 40             | -       | 30        | -0.27 | 1.69 | 34.04 | 3.29  |
|                          | V10     | V10                            | 30             | -       | 30        | -0.24 | 1.68 | 34.02 | 2.85  |
|                          | V11     | V11                            | 20             | -       | 25*       | -0.40 | 1.82 | 31.68 | 1.89  |
|                          | V12     | V12                            | 20             | -       | 25*       | -0.02 | 1.82 | 39.42 | 3.16  |
